# Supplementary material
Source: MDPI journal article supplement (https://www.mdpi.com/1424-2818/12/8/307)
Supplement: s1 [file s1]

## Supplementary Material

# Spatial and temporal trends of burnt area in Angola: Implications for natural vegetation and protected area management

Silvia Catarino <sup>1,2,\*</sup>, Maria M. Romeiras <sup>1,3</sup>, Rui Figueira <sup>1,4,5</sup>, Valentine Aubard <sup>2</sup>, João M. N. Silva <sup>2</sup>, José M. C. Pereira <sup>2</sup>

<sup>1</sup> Linking Landscape, Environment, Agriculture and Food (LEAF), School of Agriculture, University of Lisbon, 1349-017 Tapada da Ajuda, Lisbon, Portugal; scatarino@isa.ulisboa.pt

<sup>2</sup> Forest Research Centre (CEF), School of Agriculture, University of Lisbon, 1349-017 Tapada da Ajuda, Lisbon, Portugal; vaubard@isa.ulisboa.pt (V.A.); joaosilva@isa.ulisboa.pt (J.M.N.S); jmcperreira@isa.ulisboa.pt (J.M.C.P.)

<sup>3</sup> Centre for Ecology, Evolution and Environmental Changes (cE3c), Faculty of Sciences, University of Lisbon, 1749-016 Campo Grande, Lisbon, Portugal; mmromeiras@isa.ulisboa.pt

<sup>4</sup> Research Centre in Biodiversity and Genetic Resources (CIBIO/InBIO), University of Porto, Campus de Vairão, 4485-661 Vairão, Portugal; ruifigueira@isa.ulisboa.pt

<sup>5</sup> Research Centre in Biodiversity and Genetic Resources (CIBIO/InBIO), School of Agriculture, University of Lisbon, 1349-017 Tapada da Ajuda, Lisbon, Portugal; ruifigueira@isa.ulisboa.pt

\* Correspondence: scatarino@isa.ulisboa.pt

**Figure S1.** Trends of annual burnt area in Angola for the 2011–2019 period, based on Mann-Kendall single-cell analysis. The positive z-scores correspond to areas of increasing trends of burnt area, while the negative z-scores correspond to decreasing trends. The significant areas (with a confidence level of 95%) were overlaid with black lines. Protected areas are limited with blue lines: BI, Bicular; BU, Búfalo; KA, Cangandala; CM, Chimalavera; IO, Iona; IP, Ilheu dos pássaros; KM, Cameia; KI, Quiçama; LL, Luengue-Luiana; LU, Luando; MV, Mavinga; MU, Mupa; MY, Maiombe; NA, Namibe.

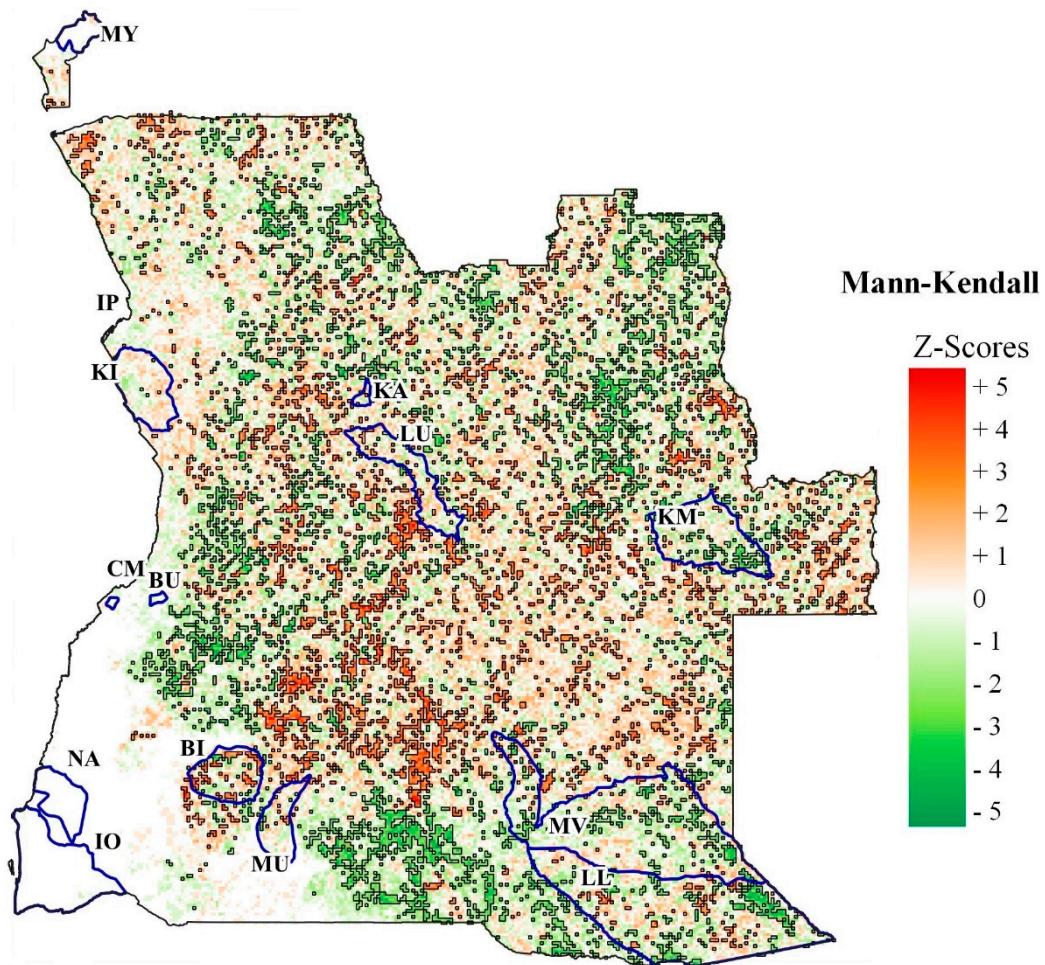

**Figure S2.** WWF ecoregions occurring in Angola and the significant cluster of increasing and decreasing trends of annual burnt area detected in 2001–2019 period, based on the Contextual Mann-Kendall test.

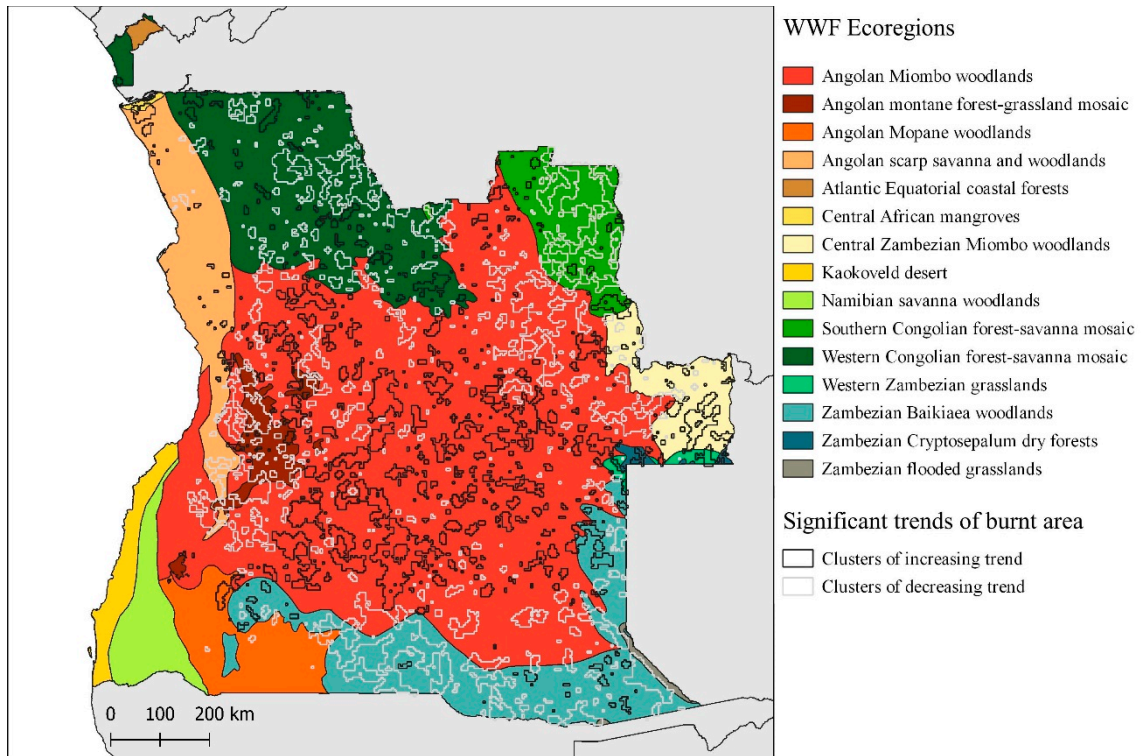

**Figure S3.** Land cover map of Angola in 2018 (300m resolution), adapted the European Space Agency (ESA) Climate Change Initiative Land Cover (CCI-LC), and the significant cluster of increasing and decreasing trends of annual burnt area detected in 2001–2019 period, based on the Contextual Mann-Kendall test.

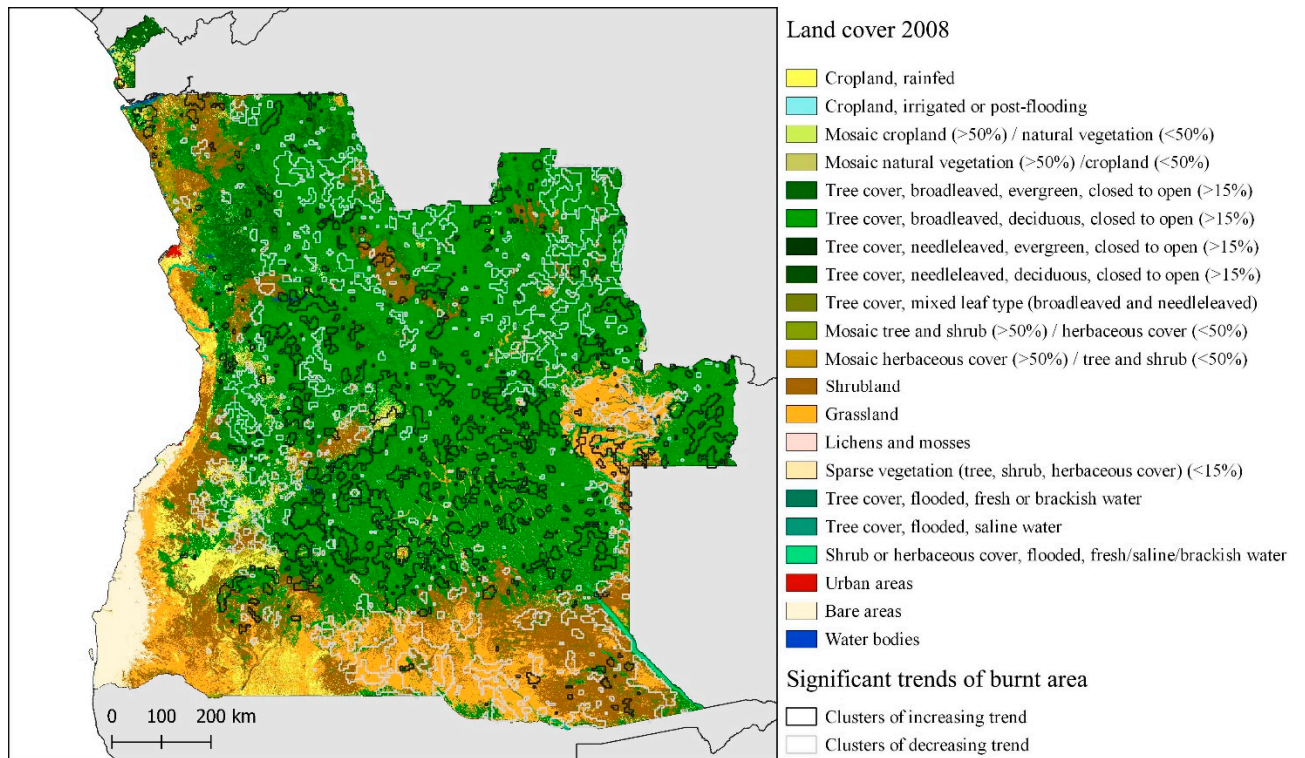

**Table S1.** Estimated fraction of burnt area per year and the average of the burnt area from 2001 to 2019 in each province.

| Province                           | Total area (km <sup>2</sup> ) | Fraction of burn area |        |        |        |        |        |        |        |        |        |        |        |        |        |        |        |        |        |        | Average of burnt area 2001-2019 (%) | Average of burnt area 2001-2019 (km <sup>2</sup> ) |
|------------------------------------|-------------------------------|-----------------------|--------|--------|--------|--------|--------|--------|--------|--------|--------|--------|--------|--------|--------|--------|--------|--------|--------|--------|-------------------------------------|----------------------------------------------------|
|                                    |                               | 2001                  | 2002   | 2003   | 2004   | 2005   | 2006   | 2007   | 2008   | 2009   | 2010   | 2011   | 2012   | 2013   | 2014   | 2015   | 2016   | 2017   | 2018   | 2019   |                                     |                                                    |
| Lunda Norte                        | 107973                        | 49%                   | 53%    | 53%    | 57%    | 56%    | 60%    | 53%    | 56%    | 58%    | 58%    | 56%    | 56%    | 53%    | 53%    | 53%    | 56%    | 57%    | 46%    | 53%    | 54%                                 | 58840                                              |
| Lunda Sul                          | 77927                         | 48%                   | 55%    | 56%    | 57%    | 55%    | 55%    | 52%    | 53%    | 56%    | 54%    | 53%    | 50%    | 53%    | 53%    | 51%    | 54%    | 53%    | 47%    | 53%    | 53%                                 | 41375                                              |
| Quando Cubango                     | 199483                        | 35%                   | 42%    | 49%    | 49%    | 49%    | 36%    | 46%    | 43%    | 35%    | 44%    | 52%    | 45%    | 47%    | 39%    | 44%    | 38%    | 38%    | 35%    | 38%    | 42%                                 | 84455                                              |
| Malanje                            | 82163                         | 39%                   | 34%    | 42%    | 45%    | 41%    | 43%    | 43%    | 40%    | 44%    | 42%    | 40%    | 44%    | 38%    | 40%    | 38%    | 40%    | 46%    | 35%    | 42%    | 41%                                 | 33586                                              |
| Cuanza Sul                         | 55257                         | 25%                   | 28%    | 33%    | 33%    | 32%    | 29%    | 31%    | 29%    | 29%    | 31%    | 31%    | 29%    | 30%    | 28%    | 29%    | 29%    | 30%    | 25%    | 30%    | 30%                                 | 16311                                              |
| Moxico                             | 199986                        | 22%                   | 23%    | 27%    | 26%    | 31%    | 23%    | 26%    | 26%    | 25%    | 27%    | 29%    | 26%    | 27%    | 24%    | 27%    | 26%    | 29%    | 25%    | 32%    | 26%                                 | 52650                                              |
| Bié                                | 72048                         | 18%                   | 21%    | 25%    | 24%    | 25%    | 24%    | 27%    | 25%    | 28%    | 25%    | 27%    | 22%    | 25%    | 23%    | 24%    | 26%    | 30%    | 20%    | 30%    | 25%                                 | 17790                                              |
| Cunene                             | 77259                         | 16%                   | 22%    | 29%    | 30%    | 24%    | 12%    | 25%    | 8%     | 18%    | 15%    | 19%    | 14%    | 18%    | 15%    | 19%    | 21%    | 17%    | 14%    | 11%    | 18%                                 | 14110                                              |
| Cuanza Norte                       | 23823                         | 16%                   | 16%    | 26%    | 19%    | 13%    | 20%    | 20%    | 18%    | 15%    | 20%    | 15%    | 17%    | 18%    | 15%    | 16%    | 17%    | 16%    | 16%    | 15%    | 17%                                 | 4117                                               |
| Huambo                             | 33133                         | 19%                   | 13%    | 16%    | 17%    | 16%    | 20%    | 17%    | 19%    | 19%    | 22%    | 18%    | 13%    | 14%    | 15%    | 16%    | 16%    | 16%    | 17%    | 21%    | 17%                                 | 5677                                               |
| Zaire                              | 36590                         | 7%                    | 14%    | 19%    | 19%    | 16%    | 21%    | 14%    | 18%    | 18%    | 21%    | 12%    | 19%    | 21%    | 15%    | 24%    | 14%    | 17%    | 15%    | 14%    | 17%                                 | 6161                                               |
| Huíla                              | 78684                         | 11%                   | 13%    | 19%    | 21%    | 18%    | 13%    | 21%    | 14%    | 16%    | 13%    | 15%    | 13%    | 14%    | 15%    | 17%    | 17%    | 19%    | 16%    | 20%    | 16%                                 | 12574                                              |
| Uíge                               | 62005                         | 14%                   | 14%    | 18%    | 14%    | 14%    | 17%    | 15%    | 13%    | 13%    | 16%    | 12%    | 17%    | 14%    | 13%    | 15%    | 14%    | 13%    | 13%    | 12%    | 14%                                 | 8912                                               |
| Benguela                           | 39509                         | 13%                   | 14%    | 16%    | 19%    | 17%    | 15%    | 13%    | 13%    | 12%    | 14%    | 11%    | 8%     | 10%    | 10%    | 9%     | 11%    | 10%    | 9%     | 11%    | 12%                                 | 4855                                               |
| Bengo                              | 34363                         | 3%                    | 7%     | 8%     | 5%     | 9%     | 8%     | 11%    | 13%    | 8%     | 7%     | 10%    | 6%     | 9%     | 8%     | 7%     | 12%    | 5%     | 7%     | 5%     | 8%                                  | 2654                                               |
| Cabinda                            | 7119                          | 0%                    | 0%     | 2%     | 1%     | 4%     | 5%     | 3%     | 3%     | 1%     | 2%     | 2%     | 3%     | 3%     | 1%     | 2%     | 3%     | 1%     | 1%     | 4%     | 2%                                  | 151                                                |
| Luanda                             | 2447                          | 0%                    | 1%     | 2%     | 1%     | 4%     | 1%     | 4%     | 4%     | 0%     | 0%     | 3%     | 1%     | 0%     | 0%     | 0%     | 2%     | 1%     | 0%     | 0%     | 1%                                  | 34                                                 |
| Namibe                             | 57911                         | 0%                    | 0%     | 0%     | 0%     | 0%     | 0%     | 0%     | 0%     | 0%     | 0%     | 0%     | 0%     | 0%     | 0%     | 0%     | 0%     | 0%     | 0%     | 0%     | 0%                                  | 49                                                 |
| <b>Area Total (km<sup>2</sup>)</b> |                               | 317030                | 347667 | 405605 | 407798 | 400665 | 358940 | 388615 | 362354 | 361274 | 381780 | 392200 | 364572 | 370787 | 349545 | 367142 | 362158 | 375292 | 315581 | 368622 |                                     |                                                    |
